# Supplementary material for: Rare Variants in Genes Encoding MuRF1 and MuRF2 Are Modifiers of Hypertrophic Cardiomyopathy
Source: Int J Mol Sci. 2014 May 26;15(6):9302–13. doi: 10.3390/ijms15069302 (PMC4100095; doi:10.3390/ijms15069302)
Supplement: Supplementary File 1 — Supplementary Information (PDF, 155 KB) [file ijms-15-09302-s001.pdf]

# Supplementary Information

**Table S1.** Common nonsynonymous variants detected in the studied population.

| Gene                             | Variant      | Genotype | HCM Patients ( <i>n</i> = 594) | Healthy Controls ( <i>n</i> = 307) | $\chi^2$ | <i>p</i> Value |
|----------------------------------|--------------|----------|--------------------------------|------------------------------------|----------|----------------|
| <i>MuRF1</i><br><i>NM_032588</i> | <i>K237E</i> | KK       | 354 (59.6)                     | 200 (65.1)                         | 3.0      | 0.09           |
|                                  |              | KE       | 212 (35.7)                     | 97 (31.6)                          |          |                |
|                                  |              | EE       | 28 (4.7)                       | 10 (3.3)                           |          |                |
|                                  |              | MAF      | 0.23                           | 0.19                               |          |                |
| <i>MuRF2</i><br><i>NM_033058</i> | <i>Q157K</i> | QQ       | 588 (99.0)                     | 302 (98.4)                         | 0.64     | 0.52           |
|                                  |              | QK       | 6 (1.0)                        | 5 (1.6)                            |          |                |
|                                  |              | MAF      | 0.007                          | 0.008                              |          |                |
|                                  | <i>A489V</i> | AA       | 586 (98.7)                     | 302 (98.4)                         | 0.11     | 0.77           |
|                                  |              | AV       | 8 (1.3)                        | 5 (1.6)                            |          |                |
|                                  |              | MAF      | 0.007                          | 0.008                              |          |                |

Data were presented as number (percentage).

**Table S2.** Rare nonsynonymous variants identified in the *MuRF3* gene.

| Gene             | cDNA                | Protein | Patients | Controls | PP2 *       | SIFT †   | Pathogenic § |
|------------------|---------------------|---------|----------|----------|-------------|----------|--------------|
| <i>MuRF3</i>     | <i>c.26C&gt;T</i>   | P9L     | 0        | 1        | pro (0.997) | T (0.12) | pathogenic   |
| <i>NM_032546</i> | <i>c.160G&gt;A</i>  | V54I    | 1        | 0        | ben (0.025) | T (1.00) | benign       |
|                  | <i>c.280G&gt;T</i>  | G94C    | 1        | 0        | pro (1)     | D (0)    | pathogenic   |
|                  | <i>c.343C&gt;T</i>  | P115S   | 0        | 1        | pos (0.521) | T (0.08) | pathogenic   |
|                  | <i>c.488T&gt;C</i>  | L163P   | 0        | 1        | pro (1)     | T (0.17) | pathogenic   |
|                  | <i>c.587C&gt;T</i>  | P196L   | 1        | 1        | ben (0)     | T (0.31) | benign       |
|                  | <i>c.607A&gt;G</i>  | I203V   | 1        | 0        | ben (0.001) | T (0.29) | benign       |
|                  | <i>c.662C&gt;T</i>  | A221V   | 1        | 0        | pro (0.999) | T (0.27) | pathogenic   |
|                  | <i>c.746G&gt;A</i>  | R249Q   | 0        | 1        | pos (0.582) | T (0.44) | pathogenic   |
|                  | <i>c.806G&gt;A</i>  | R269H   | 1        | 0        | pro (1)     | D (0.01) | pathogenic   |
|                  | <i>c.810G&gt;T</i>  | K270N   | 1        | 0        | pro (0.999) | D (0)    | pathogenic   |
|                  | <i>c.859C&gt;A</i>  | R287S   | 1        | 0        | ben (0.033) | T (0.86) | benign       |
|                  | <i>c.860G&gt;T</i>  | R287L   | 1        | 0        | ben (0.005) | T (0.69) | benign       |
|                  | <i>c.1015G&gt;A</i> | E339K   | 2        | 1        | ben (0.051) | T (0.29) | benign       |
|                  | <i>c.1036C&gt;A</i> | P346T   | 1        | 0        | pos (0.758) | T (0.19) | pathogenic   |
|                  | <i>c.1066G&gt;T</i> | V356L   | 0        | 1        | ben (0.023) | T (0.88) | benign       |
|                  | <i>c.1087G&gt;A</i> | E363K   | 0        | 1        | ben (0.002) | T (0.87) | benign       |
|                  | <i>c.1118G&gt;A</i> | G373D   | 1        | 0        | pro (0.999) | T (0.39) | pathogenic   |
|                  | <i>c.1147C&gt;A</i> | P383T   | 1        | 0        | ben (0.066) | T (0.32) | benign       |

\* Pathogenicity and scores of missense variants predicted by PolyPhen2; Pro, probably damaging; pos, possible damaging, and ben means benign; † Pathogenicity and scores of missense variants predicted by SIFT; D, deleterious; T, tolerated; § The pathogenic missense variant is defined by a damaging effect predicted by either PolyPhen2 or SIFT.

**Table S3.** Correlation of rare variants in *MuRF1* and *MuRF2* genes to the clinical manifestations of patients with hypertrophic cardiomyopathy.

| Clinical Manifestations        | Total (n = 594) | Rare Variant  |                   |         |
|--------------------------------|-----------------|---------------|-------------------|---------|
|                                |                 | With (n = 34) | Without (n = 560) | p Value |
| Age (year)                     | 49.3 ± 14.1     | 44.5 ± 14.2   | 49.6 ± 14.0       | 0.04    |
| Female (No.)                   | 183 (30.8%)     | 13 (38.2%)    | 170 (30.4%)       | 0.34    |
| Height (cm)                    | 167.1 ± 8.0     | 166.8 ± 8.9   | 167.1 ± 8.0       | 0.81    |
| Weight (kg)                    | 71.1 ± 11.9     | 68.7 ± 10.1   | 71.2 ± 12.0       | 0.23    |
| FH of HCM (No.)                | 133 (22.4%)     | 11 (32.4%)    | 122 (21.8%)       | 0.20    |
| FH of SCD (No.)                | 76 (12.8%)      | 5 (14.7%)     | 71 (12.7%)        | 0.79    |
| Heart rate (bpm)               | 71.0 ± 12.0     | 69.4 ± 12.5   | 71.1 ± 11.9       | 0.43    |
| Abnormal Q wave (No.)          | 133 (22.4%)     | 10 (29.4%)    | 123 (22.0%)       | 0.30    |
| Abnormal T wave (No.)          | 396 (66.7%)     | 23 (67.6%)    | 373 (66.6%)       | 1.0     |
| NYHA class III or IV (No.)     | 68 (11.4%)      | 5 (14.7%)     | 63 (11.2%)        | 0.58    |
| Maximum LV wall thickness (mm) | 21.6 ± 4.7      | 23.8 ± 5.2    | 21.5 ± 4.7        | 0.006   |
| LV end diastolic diameter (mm) | 44.9 ± 6.1      | 43.5 ± 6.2    | 45.0 ± 6.0        | 0.16    |
| LV ejection fraction (%)       | 66.6 ± 8.8      | 64.5 ± 10.3   | 66.7 ± 8.7        | 0.15    |
| LV outflow obstruction (No.) * | 230 (38.7%)     | 11 (32.4%)    | 219 (39.1%)       | 0.47    |
| Left atrium size (mm)          | 40.1 ± 6.8      | 39.6 ± 7.2    | 40.1 ± 6.8        | 0.68    |

Abbreviations: FH, family history; HCM, hypertrophic cardiomyopathy; LV, left ventricular; NYHA, New York Heart Association; SCD, sudden cardiac death; \* Defined as left ventricular outflow tract gradient  $\geq 30$  mmHg at resting.
